# Supplementary material for: AmPEP: Sequence-based prediction of antimicrobial peptides using distribution patterns of amino acid properties and random forest
Source: PubMed Central journal article supplement (PMC5785966; doi:10.1038/s41598-018-19752-w), 2018-01-26

## Supplementary Information

### **AmPEP: Sequence-based prediction of antimicrobial peptides using distribution patterns of amino acid properties and random forest**

Pratiti Bhadra, Jielu Yan, Jinyan Li, Simon Fong, and Shirley W. I. Siu\*

*Department of Computer and Information Science, University of Macau  
Avenida da Universidade, Taipa, Macau, China*

\*Corresponding author: [shirleysiu@umac.mo](mailto:shirleysiu@umac.mo)

Last update: 14 Dec 2017

**Supplementary Table S1.** Pearson correlation coefficients (PCC) of AMP/non-AMP distributions using  $M^{model\_train}$ . A descriptor is named with its *physicochemical property*, *class*, and *distribution* (“first residue” is coded as 001, “25% residues” as 025, “50% residues” as 050, “75% residues” as 075, “last residue” as 100). Descriptors with PCC < 0.5 are shown with boldface; those with PCC < 0.5 also in the two other datasets ( $C^{train}$ ,  $C^{test}$ ) are marked with asterisks.

| Descriptor                          | PCC          | Descriptor                  | PCC          | Descriptor                    | PCC          |
|-------------------------------------|--------------|-----------------------------|--------------|-------------------------------|--------------|
| Charge_C1_001                       | 0.690        | Polarizability_C3_025       | 0.751        | NormalizedVDWV_C2_075         | 0.632        |
| <b>Charge_C2_001*</b>               | <b>0.063</b> | SecondaryStr_C1_025         | 0.797        | NormalizedVDWV_C3_075         | 0.675        |
| <b>Charge_C3_001</b>                | <b>0.252</b> | SecondaryStr_C2_025         | 0.711        | Polarity_C1_075               | 0.730        |
| Hydrophobicity_C1_001               | 0.747        | SecondaryStr_C3_025         | 0.571        | <b>Polarity_C2_075*</b>       | <b>0.311</b> |
| Hydrophobicity_C2_001               | 0.549        | SolventAccessibility_C1_025 | 0.643        | Polarity_C3_075               | 0.544        |
| <b>Hydrophobicity_C3_001*</b>       | <b>0.128</b> | SolventAccessibility_C2_025 | 0.729        | Polarizability_C1_075         | 0.525        |
| NormalizedVDWV_C1_001               | 0.554        | SolventAccessibility_C3_025 | 0.669        | Polarizability_C2_075         | 0.801        |
| NormalizedVDWV_C2_001               | 0.625        | Charge_C1_050               | 0.597        | Polarizability_C3_075         | 0.675        |
| <b>NormalizedVDWV_C3_001*</b>       | <b>0.301</b> | <b>Charge_C2_050*</b>       | <b>0.288</b> | SecondaryStr_C1_075           | 0.747        |
| <b>Polarity_C1_001*</b>             | <b>0.130</b> | <b>Charge_C3_050</b>        | <b>0.268</b> | SecondaryStr_C2_075           | 0.807        |
| Polarity_C2_001                     | 0.512        | Hydrophobicity_C1_050       | 0.679        | SecondaryStr_C3_075           | 0.627        |
| Polarity_C3_001                     | 0.689        | Hydrophobicity_C2_050       | 0.719        | SolventAccessibility_C1_075   | 0.727        |
| Polarizability_C1_001               | 0.584        | Hydrophobicity_C3_050       | 0.683        | SolventAccessibility_C2_075   | 0.609        |
| Polarizability_C2_001               | 0.614        | NormalizedVDWV_C1_050       | 0.628        | SolventAccessibility_C3_075   | 0.613        |
| <b>Polarizability_C3_001*</b>       | <b>0.301</b> | NormalizedVDWV_C2_050       | 0.627        | Charge_C1_100                 | 0.571        |
| <b>SecondaryStr_C1_001*</b>         | <b>0.346</b> | NormalizedVDWV_C3_050       | 0.672        | <b>Charge_C2_100</b>          | <b>0.484</b> |
| SecondaryStr_C2_001                 | 0.657        | Polarity_C1_050             | 0.710        | <b>Charge_C3_100*</b>         | <b>0.184</b> |
| SecondaryStr_C3_001                 | 0.768        | <b>Polarity_C2_050*</b>     | <b>0.357</b> | <b>Hydrophobicity_C1_100*</b> | <b>0.464</b> |
| <b>SolventAccessibility_C1_001</b>  | <b>0.432</b> | Polarity_C3_050             | 0.648        | Hydrophobicity_C2_100         | 0.559        |
| SolventAccessibility_C2_001         | 0.747        | Polarizability_C1_050       | 0.636        | Hydrophobicity_C3_100         | 0.652        |
| <b>SolventAccessibility_C3_001*</b> | <b>0.296</b> | Polarizability_C2_050       | 0.684        | NormalizedVDWV_C1_100         | 0.529        |
| Charge_C1_025                       | 0.588        | Polarizability_C3_050       | 0.672        | NormalizedVDWV_C2_100         | 0.558        |
| Charge_C2_025                       | 0.661        | SecondaryStr_C1_050         | 0.720        | NormalizedVDWV_C3_100         | 0.567        |
| <b>Charge_C3_025</b>                | <b>0.237</b> | SecondaryStr_C2_050         | 0.739        | Polarity_C1_100               | 0.645        |
| Hydrophobicity_C1_025               | 0.729        | SecondaryStr_C3_050         | 0.640        | Polarity_C2_100               | 0.521        |

|                         |              |                                    |              |                                     |              |
|-------------------------|--------------|------------------------------------|--------------|-------------------------------------|--------------|
| Hydrophobicity_C2_025   | 0.782        | <b>SolventAccessibility_C1_050</b> | <b>0.432</b> | Polarity_C3_100                     | 0.570        |
| Hydrophobicity_C3_025   | 0.640        | SolventAccessibility_C2_050        | 0.679        | Polarizability_C1_100               | 0.503        |
| NormalizedVDWV_C1_025   | 0.703        | SolventAccessibility_C3_050        | 0.629        | Polarizability_C2_100               | 0.565        |
| NormalizedVDWV_C2_025   | 0.617        | <b>Charge_C1_075</b>               | <b>0.473</b> | Polarizability_C3_100               | 0.567        |
| NormalizedVDWV_C3_025   | 0.751        | Charge_C2_075                      | 0.782        | <b>SecondaryStr_C1_100*</b>         | <b>0.420</b> |
| Polarity_C1_025         | 0.636        | <b>Charge_C3_075</b>               | <b>0.231</b> | SecondaryStr_C2_100                 | 0.723        |
| <b>Polarity_C2_025*</b> | <b>0.315</b> | Hydrophobicity_C1_075              | 0.609        | SecondaryStr_C3_100                 | 0.618        |
| Polarity_C3_025         | 0.657        | Hydrophobicity_C2_075              | 0.696        | SolventAccessibility_C1_100         | 0.546        |
| Polarizability_C1_025   | 0.705        | Hydrophobicity_C3_075              | 0.727        | <b>SolventAccessibility_C2_100*</b> | <b>0.464</b> |
| Polarizability_C2_025   | 0.731        | NormalizedVDWV_C1_075              | 0.638        | SolventAccessibility_C3_100         | 0.639        |

**Supplementary Table S2.** Datasets generated from  $M^{model\_train}$  for P:N ratio tests of AMP prediction. Size of the positive dataset is 3268.

| <b>P:N ratio</b> | <b>Size of one non-AMP subset</b> | <b>Total number of non-AMP subsets</b> |
|------------------|-----------------------------------|----------------------------------------|
| 1:1              | 3268                              | 51                                     |
| 1:1.5            | 4902                              | 34                                     |
| 1:2              | 6536                              | 26                                     |
| 1:2.5            | 8170                              | 20                                     |
| 1:3              | 9804                              | 17                                     |
| 1:3.5            | 11438                             | 15                                     |
| 1:4              | 13072                             | 13                                     |
| 1:4.5            | 14706                             | 11                                     |
| 1:5              | 16340                             | 10                                     |
| 1:5.5            | 17974                             | 9                                      |
| 1:6              | 19608                             | 9                                      |
| 1:6.5            | 21242                             | 8                                      |
| 1:7              | 22876                             | 7                                      |
| 1:7.5            | 24510                             | 7                                      |
| 1:8              | 26144                             | 6                                      |
| 1:8.5            | 27778                             | 6                                      |
| 1:9              | 29412                             | 6                                      |
| 1:9.5            | 31046                             | 5                                      |
| 1:10             | 32680                             | 5                                      |

**Supplementary Table S3.** Performance of RF classifiers using different P:N ratios in 10-fold cross validation. Values shown are averages and standard deviations (in brackets) over all corresponding subsets. The optimal model based on C-measure is ratio 1:3.

| <b>P:N ratio</b> | <i>Sn</i>        | <i>Sp</i>        | <i>Acc</i>       | <i>MCC</i>       | <i>AUC-ROC</i>   | <i>AUC-PR</i>    | <i>Kappa</i>     | <i>C-measure</i> |
|------------------|------------------|------------------|------------------|------------------|------------------|------------------|------------------|------------------|
| 1:1              | 0.978<br>(0.002) | 0.945<br>(0.004) | 0.962<br>(0.002) | 0.924<br>(0.004) | 0.988<br>(0.001) | 0.698<br>(0.024) | 0.923<br>(0.005) | 0.588<br>(0.018) |
| 1:1.5            | 0.972<br>(0.002) | 0.952<br>(0.003) | 0.960<br>(0.002) | 0.917<br>(0.004) | 0.989<br>(0.001) | 0.755<br>(0.017) | 0.917<br>(0.004) | 0.628<br>(0.011) |
| 1:2              | 0.965<br>(0.003) | 0.957<br>(0.002) | 0.960<br>(0.002) | 0.912<br>(0.004) | 0.989<br>(0.001) | 0.791<br>(0.014) | 0.911<br>(0.005) | 0.650<br>(0.009) |
| 1:2.5            | 0.958<br>(0.003) | 0.961<br>(0.002) | 0.961<br>(0.002) | 0.906<br>(0.004) | 0.989<br>(0.001) | 0.814<br>(0.015) | 0.905<br>(0.004) | 0.660<br>(0.010) |
| 1:3              | 0.950<br>(0.003) | 0.965<br>(0.002) | 0.962<br>(0.002) | 0.900<br>(0.004) | 0.989<br>(0.000) | 0.830<br>(0.009) | 0.899<br>(0.004) | 0.665<br>(0.006) |
| 1:3.5            | 0.943<br>(0.004) | 0.968<br>(0.001) | 0.962<br>(0.002) | 0.893<br>(0.005) | 0.989<br>(0.001) | 0.840<br>(0.010) | 0.893<br>(0.005) | 0.663<br>(0.009) |
| 1:4              | 0.936<br>(0.004) | 0.970<br>(0.002) | 0.963<br>(0.002) | 0.888<br>(0.005) | 0.989<br>(0.001) | 0.849<br>(0.007) | 0.888<br>(0.005) | 0.663<br>(0.007) |
| 1:4.5            | 0.929<br>(0.004) | 0.973<br>(0.001) | 0.965<br>(0.002) | 0.884<br>(0.005) | 0.989<br>(0.000) | 0.857<br>(0.007) | 0.884<br>(0.005) | 0.662<br>(0.008) |
| 1:5              | 0.921<br>(0.004) | 0.974<br>(0.001) | 0.965<br>(0.001) | 0.878<br>(0.003) | 0.989<br>(0.001) | 0.858<br>(0.004) | 0.877<br>(0.003) | 0.653<br>(0.005) |
| 1:5.5            | 0.915<br>(0.006) | 0.975<br>(0.001) | 0.966<br>(0.001) | 0.873<br>(0.004) | 0.989<br>(0.000) | 0.862<br>(0.006) | 0.873<br>(0.004) | 0.649<br>(0.007) |
| 1:6              | 0.908<br>(0.005) | 0.977<br>(0.001) | 0.967<br>(0.001) | 0.868<br>(0.004) | 0.989<br>(0.001) | 0.862<br>(0.007) | 0.867<br>(0.004) | 0.642<br>(0.010) |
| 1:6.5            | 0.902<br>(0.006) | 0.978<br>(0.001) | 0.968<br>(0.001) | 0.863<br>(0.006) | 0.989<br>(0.001) | 0.864<br>(0.005) | 0.863<br>(0.006) | 0.637<br>(0.009) |
| 1:7              | 0.894<br>(0.004) | 0.979<br>(0.001) | 0.968<br>(0.001) | 0.858<br>(0.004) | 0.989<br>(0.001) | 0.864<br>(0.005) | 0.858<br>(0.004) | 0.629<br>(0.008) |
| 1:7.5            | 0.889<br>(0.007) | 0.980<br>(0.001) | 0.969<br>(0.001) | 0.854<br>(0.007) | 0.989<br>(0.001) | 0.864<br>(0.007) | 0.854<br>(0.006) | 0.623<br>(0.011) |
| 1:8              | 0.882<br>(0.009) | 0.981<br>(0.001) | 0.970<br>(0.002) | 0.850<br>(0.008) | 0.989<br>(0.001) | 0.863<br>(0.004) | 0.850<br>(0.008) | 0.616<br>(0.013) |
| 1:8.5            | 0.875<br>(0.009) | 0.982<br>(0.001) | 0.971<br>(0.001) | 0.846<br>(0.007) | 0.989<br>(0.000) | 0.859<br>(0.005) | 0.846<br>(0.007) | 0.608<br>(0.012) |
| 1:9              | 0.869<br>(0.007) | 0.982<br>(0.000) | 0.971<br>(0.001) | 0.841<br>(0.006) | 0.989<br>(0.000) | 0.858<br>(0.006) | 0.841<br>(0.006) | 0.601<br>(0.012) |
| 1:9.5            | 0.861<br>(0.005) | 0.983<br>(0.001) | 0.972<br>(0.001) | 0.837<br>(0.006) | 0.989<br>(0.000) | 0.857<br>(0.002) | 0.836<br>(0.006) | 0.593<br>(0.010) |
| 1:10             | 0.859<br>(0.006) | 0.984<br>(0.001) | 0.972<br>(0.001) | 0.835<br>(0.005) | 0.989<br>(0.001) | 0.857<br>(0.006) | 0.835<br>(0.005) | 0.590<br>(0.011) |

**Supplementary Table S4.** Comparison of RF and SVM classifiers using  $D_F$  features and AMP/non-AMP data ratio of 1:3 in 10-fold cross-validation. Values shown are averages and standard deviations (in brackets) over all corresponding subsets

| <b>Method</b> | <b><i>Sn</i></b> | <b><i>Sp</i></b> | <b><i>Acc</i></b> | <b><i>MCC</i></b> | <b><i>AUC-ROC</i></b> | <b><i>AUC-PR</i></b> | <b><i>Kappa</i></b> | <b><i>C-measure</i></b> |
|---------------|------------------|------------------|-------------------|-------------------|-----------------------|----------------------|---------------------|-------------------------|
| RF            | 0.950<br>(0.003) | 0.965<br>(0.002) | 0.962<br>(0.002)  | 0.900<br>(0.004)  | 0.989<br>(0.000)      | 0.830<br>(0.009)     | 0.889<br>(0.004)    | 0.665<br>(0.006)        |
| SVM           | 0.532<br>(0.042) | 0.949<br>(0.006) | 0.844<br>(0.012)  | 0.552<br>(0.038)  | 0.813<br>(0.030)      | 0.681<br>(0.034)     | 1.0<br>(0.000)      | 0.305<br>(0.047)        |

**Supplementary Table S5.** A comparison of RF classifiers using different descriptors by 10-fold cross-validation with the AMP data ratio of 1:1. Values shown are averages and standard deviations (in brackets) over 10 times of 10-fold cross validation. The best two results in each performance measure are highlighted.

| Feature set {#}                                                                     | <i>Sn</i>               | <i>Sp</i>               | <i>Acc</i>              | <i>MCC</i>              | <i>AUC-ROC</i>          | <i>AUC-PR</i>           | <i>Kappa</i>            | <i>C-measure</i>        |
|-------------------------------------------------------------------------------------|-------------------------|-------------------------|-------------------------|-------------------------|-------------------------|-------------------------|-------------------------|-------------------------|
| AmPEP {105}                                                                         | <b>0.978</b><br>(0.002) | <b>0.945</b><br>(0.004) | <b>0.962</b><br>(0.002) | <b>0.924</b><br>(0.004) | <b>0.988</b><br>(0.001) | 0.698<br>(0.024)        | <b>0.923</b><br>(0.005) | 0.588<br>(0.018)        |
| AAC {20}                                                                            | <b>0.948</b><br>(0.002) | <b>0.946</b><br>(0.001) | <b>0.947</b><br>(0.001) | <b>0.894</b><br>(0.002) | <b>0.985</b><br>(0.000) | 0.77<br>(0.004)         | <b>0.894</b><br>(0.002) | 0.606<br>(0.004)        |
| PAAC {24}                                                                           | 0.948<br>(0.001)        | <b>0.945</b><br>(0.002) | <b>0.947</b><br>(0.001) | 0.893<br>(0.001)        | 0.984<br>(0.000)        | 0.822<br>(0.006)        | 0.893<br>(0.001)        | <b>0.645</b><br>(0.006) |
| K-mer {400}                                                                         | 0.939<br>(0.002)        | 0.944<br>(0.002)        | 0.941<br>(0.001)        | 0.883<br>(0.002)        | 0.983<br>(0.000)        | <b>0.876</b><br>(0.005) | 0.883<br>(0.002)        | <b>0.671</b><br>(0.006) |
| Auto Covariance (AC) {6}                                                            | 0.761<br>(0.002)        | 0.844<br>(0.003)        | 0.802<br>(0.002)        | 0.606<br>(0.004)        | 0.870<br>(0.001)        | 0.814<br>(0.004)        | 0.604<br>(0.004)        | 0.259<br>(0.005)        |
| Cross Covariance (CC) {12}                                                          | 0.802<br>(0.003)        | 0.85<br>(0.003)         | 0.826<br>(0.003)        | 0.653<br>(0.005)        | 0.897<br>(0.002)        | 0.851<br>(0.002)        | 0.652<br>(0.005)        | 0.325<br>(0.005)        |
| Auto-Cross Covariance (ACC) {18}                                                    | 0.83<br>(0.002)         | 0.863<br>(0.003)        | 0.846<br>(0.002)        | 0.693<br>(0.004)        | 0.914<br>(0.001)        | <b>0.863</b><br>(0.003) | 0.693<br>(0.004)        | 0.379<br>(0.005)        |
| Parallel Correlation Pseudo Amino Acid Composition (PC-PseAAC) {22}                 | 0.948<br>(0.001)        | <b>0.945</b><br>(0.002) | <b>0.947</b><br>(0.002) | 0.893<br>(0.003)        | 0.984<br>(0.000)        | 0.806<br>(0.006)        | 0.893<br>(0.003)        | 0.633<br>(0.007)        |
| Series Correlation Pseudo Amino Acid Composition (SC-PseAAC) {26}                   | <b>0.948</b><br>(0.001) | <b>0.946</b><br>(0.002) | <b>0.947</b><br>(0.001) | 0.893<br>(0.002)        | 0.984<br>(0.000)        | 0.805<br>(0.005)        | 0.893<br>(0.002)        | 0.633<br>(0.006)        |
| General Parallel Correlation Pseudo Amino Acid Composition (PC-PseAAC-General) {22} | 0.946<br>(0.001)        | 0.942<br>(0.001)        | 0.944<br>(0.001)        | 0.888<br>(0.002)        | 0.984<br>(0.000)        | 0.823<br>(0.006)        | 0.888<br>(0.002)        | 0.639<br>(0.005)        |
| Parallel Series Correlation Pseudo Amino Acid Composition (SC-PseAAC-General) {26}  | 0.946<br>(0.001)        | 0.943<br>(0.002)        | 0.944<br>(0.001)        | 0.889<br>(0.002)        | 0.983<br>(0.000)        | 0.822<br>(0.005)        | 0.889<br>(0.002)        | 0.639<br>(0.005)        |

AAC: Amino Acid Composition, PAAC: Pseudo Amino Acid Composition

AAC and PseAAC were generated using propy 1.0 package (default parameter of propy is used).

Other descriptors, K-mer, AC, CC, ACC, PC-PseAAC, SC-PseAAC, PC-PseAAC-General, SC-PseAAC-General were generated by Pse-in-One-1.0.4 using default parameters.

**Supplementary Figure S1.** Comparison of the AMP and non-AMP statistical distributions of 105 descriptors.

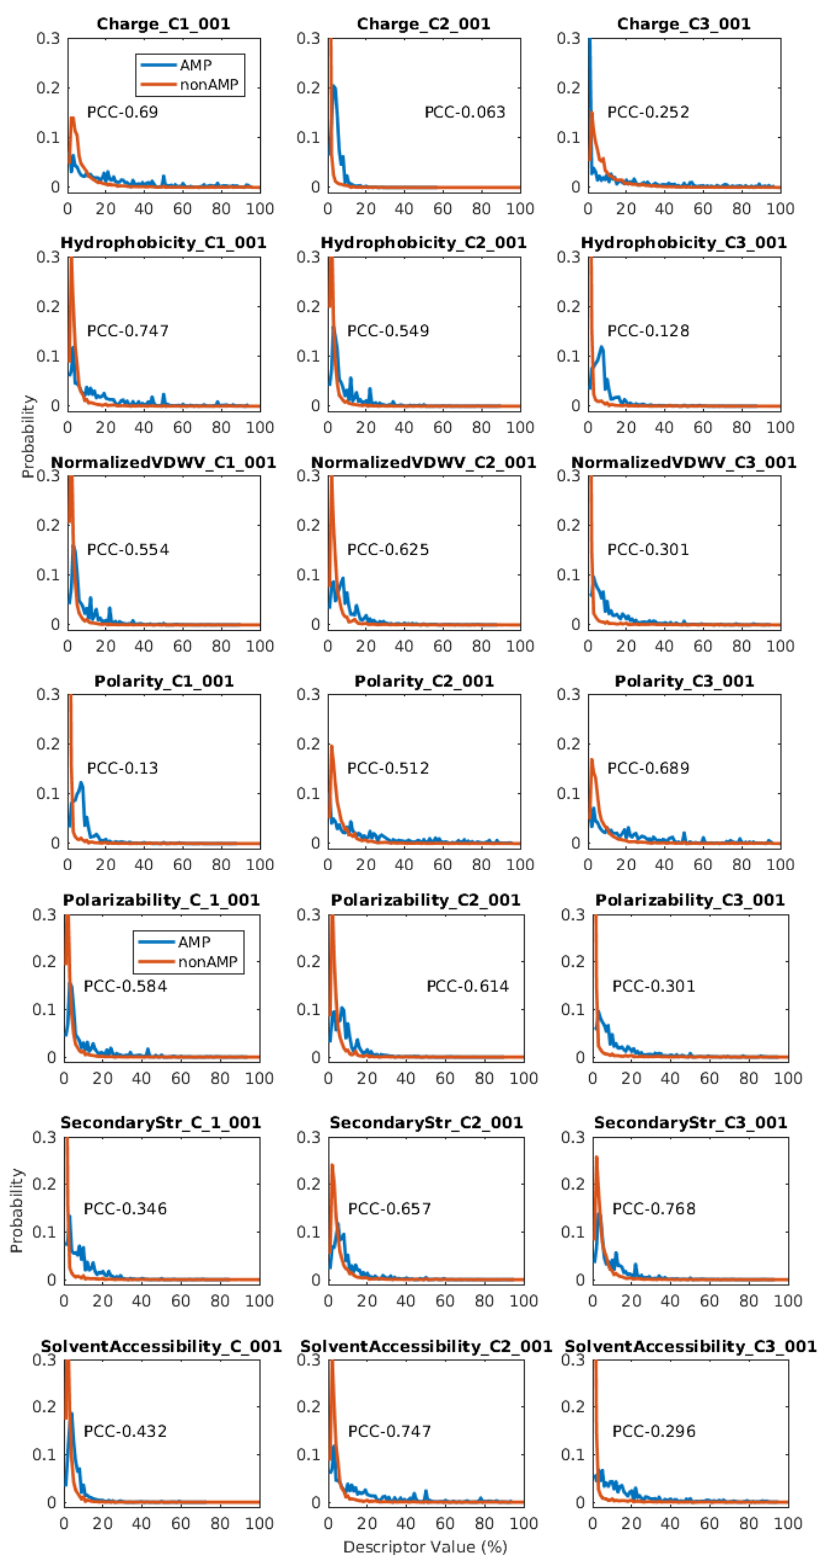



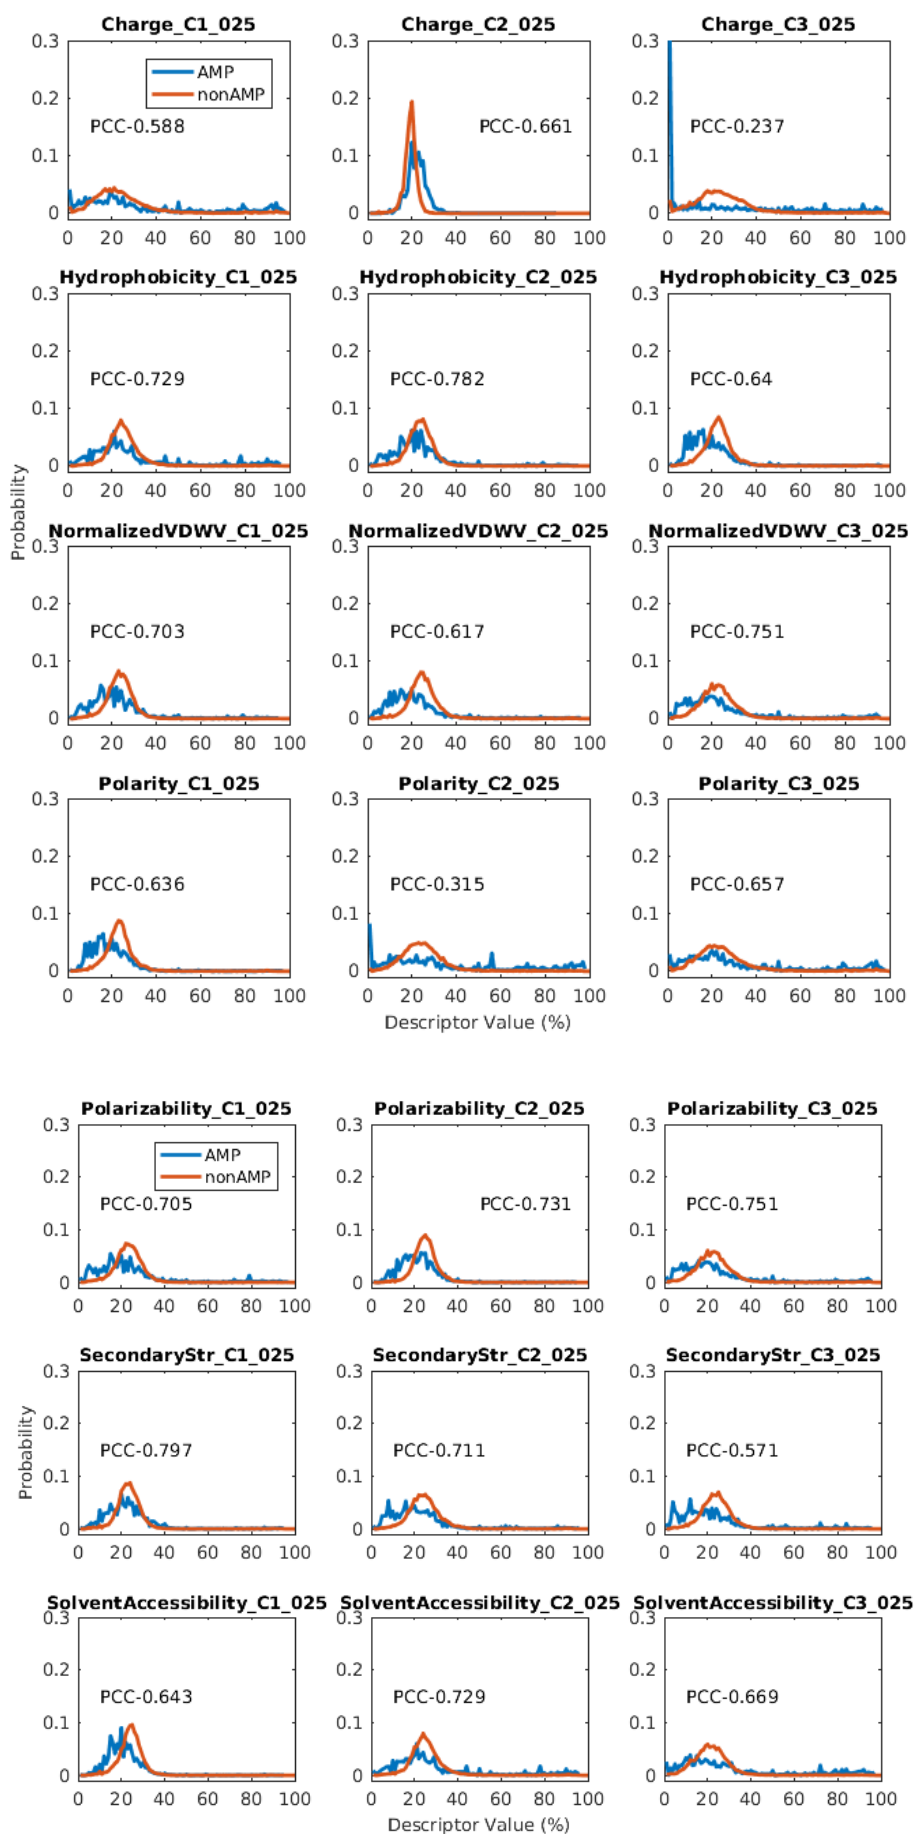

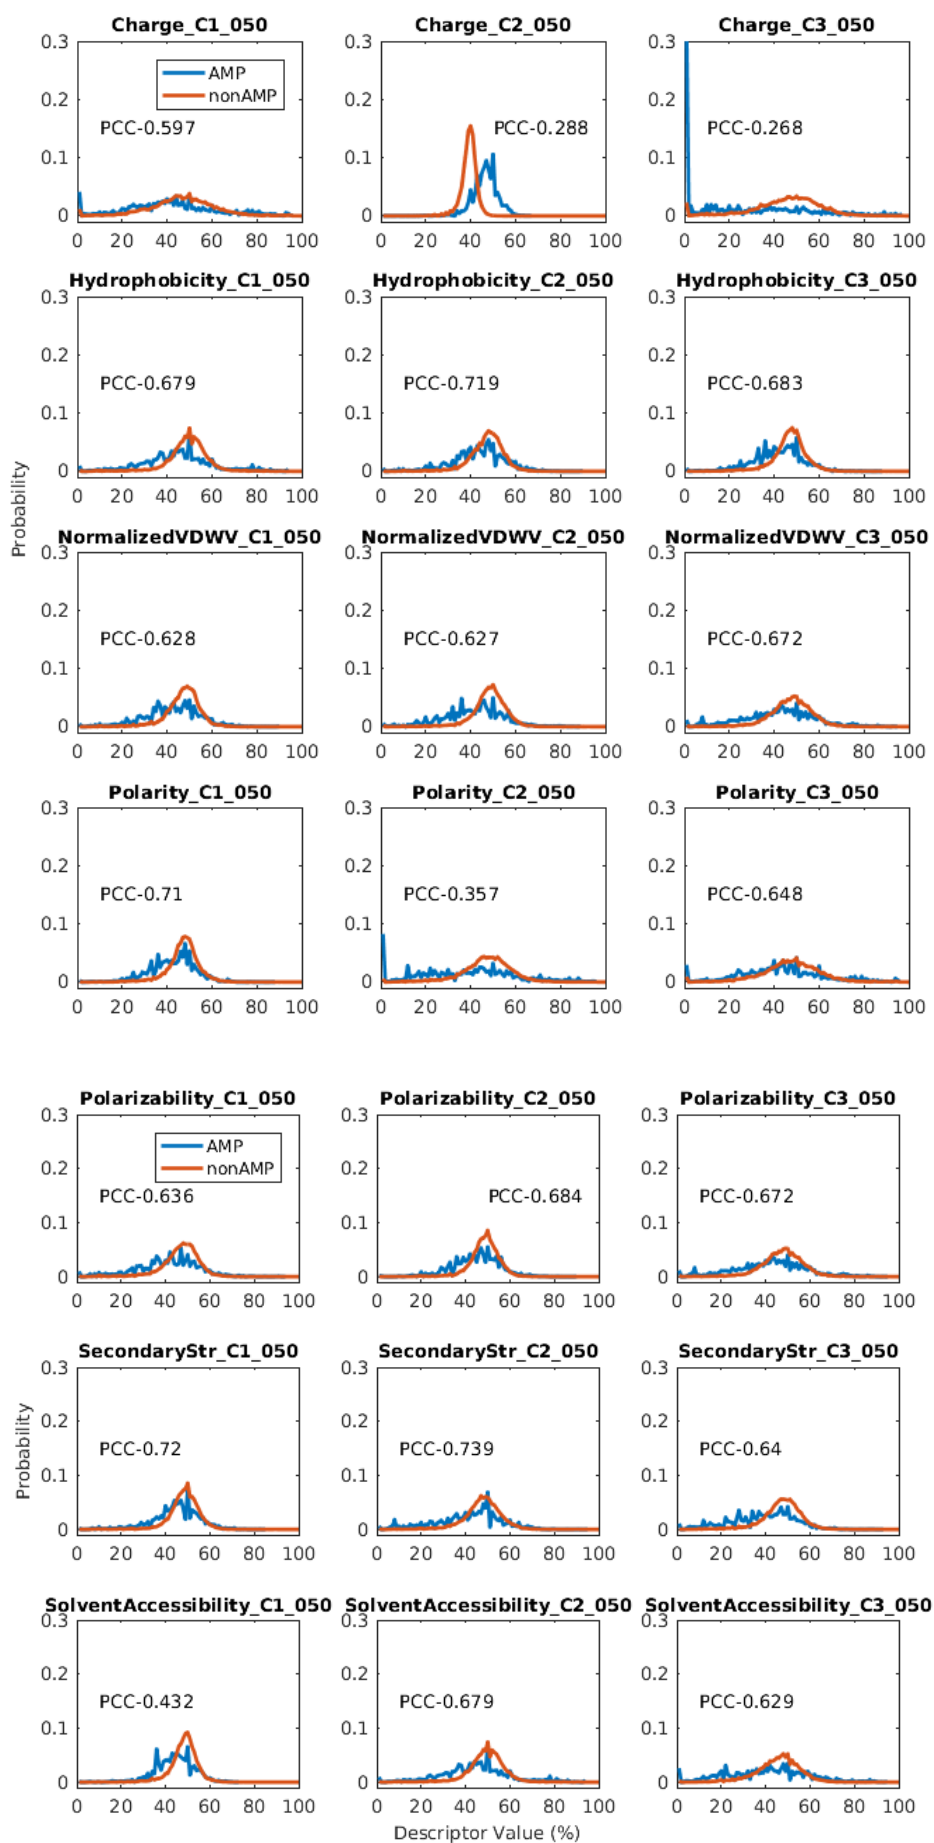

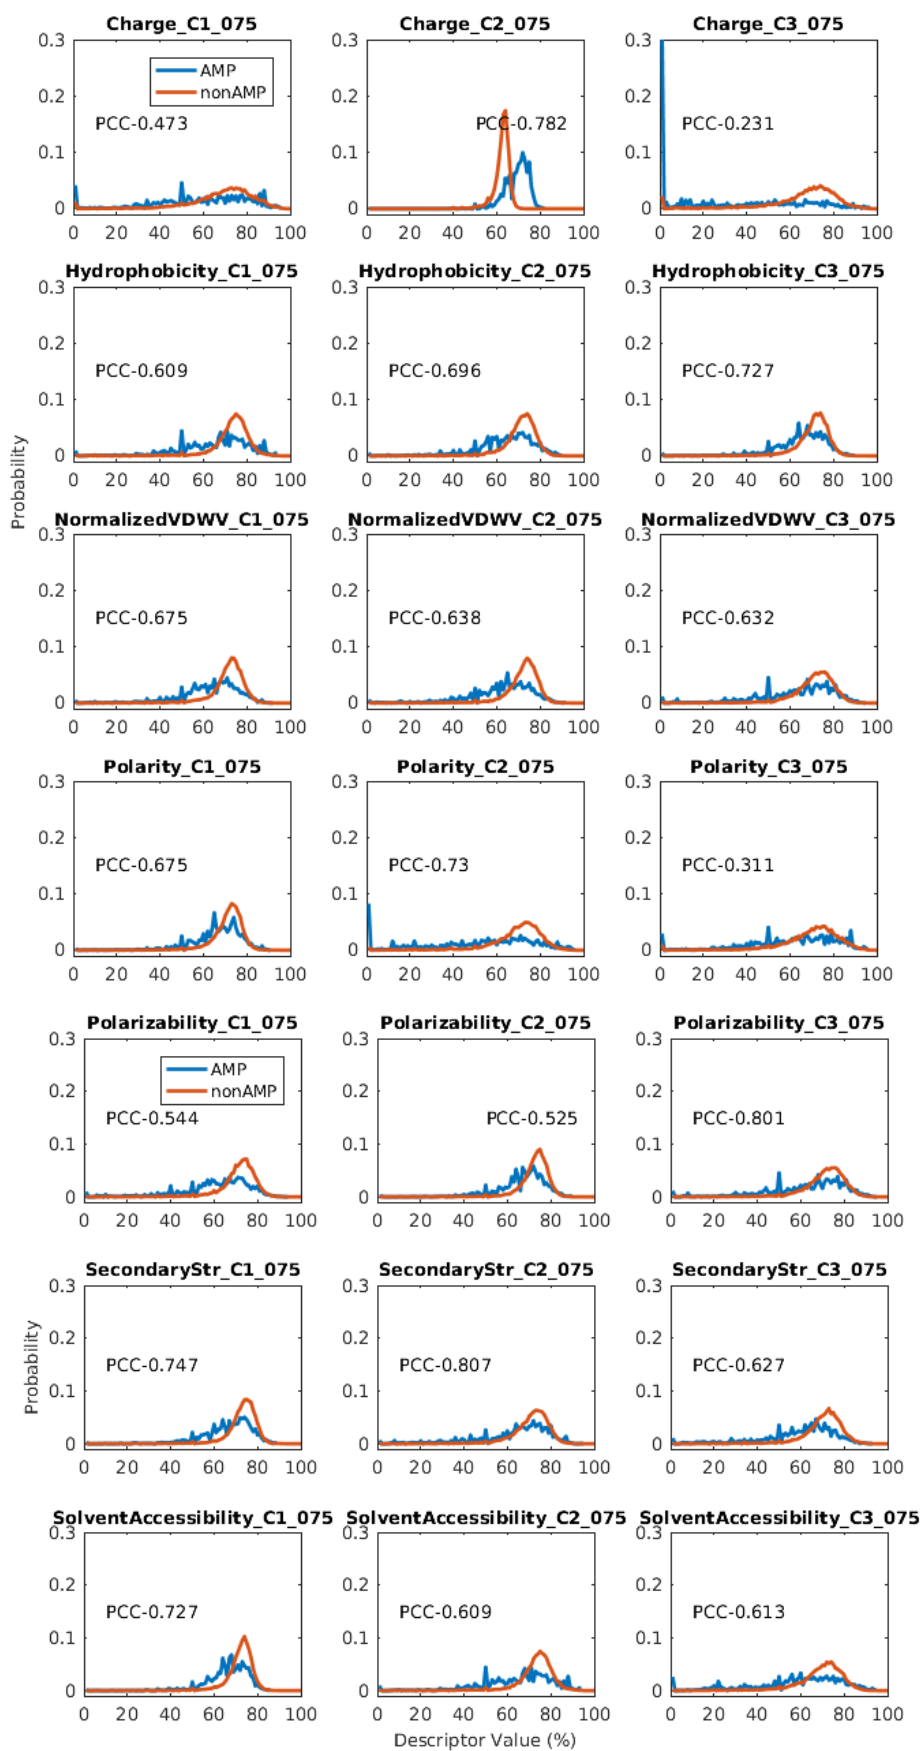

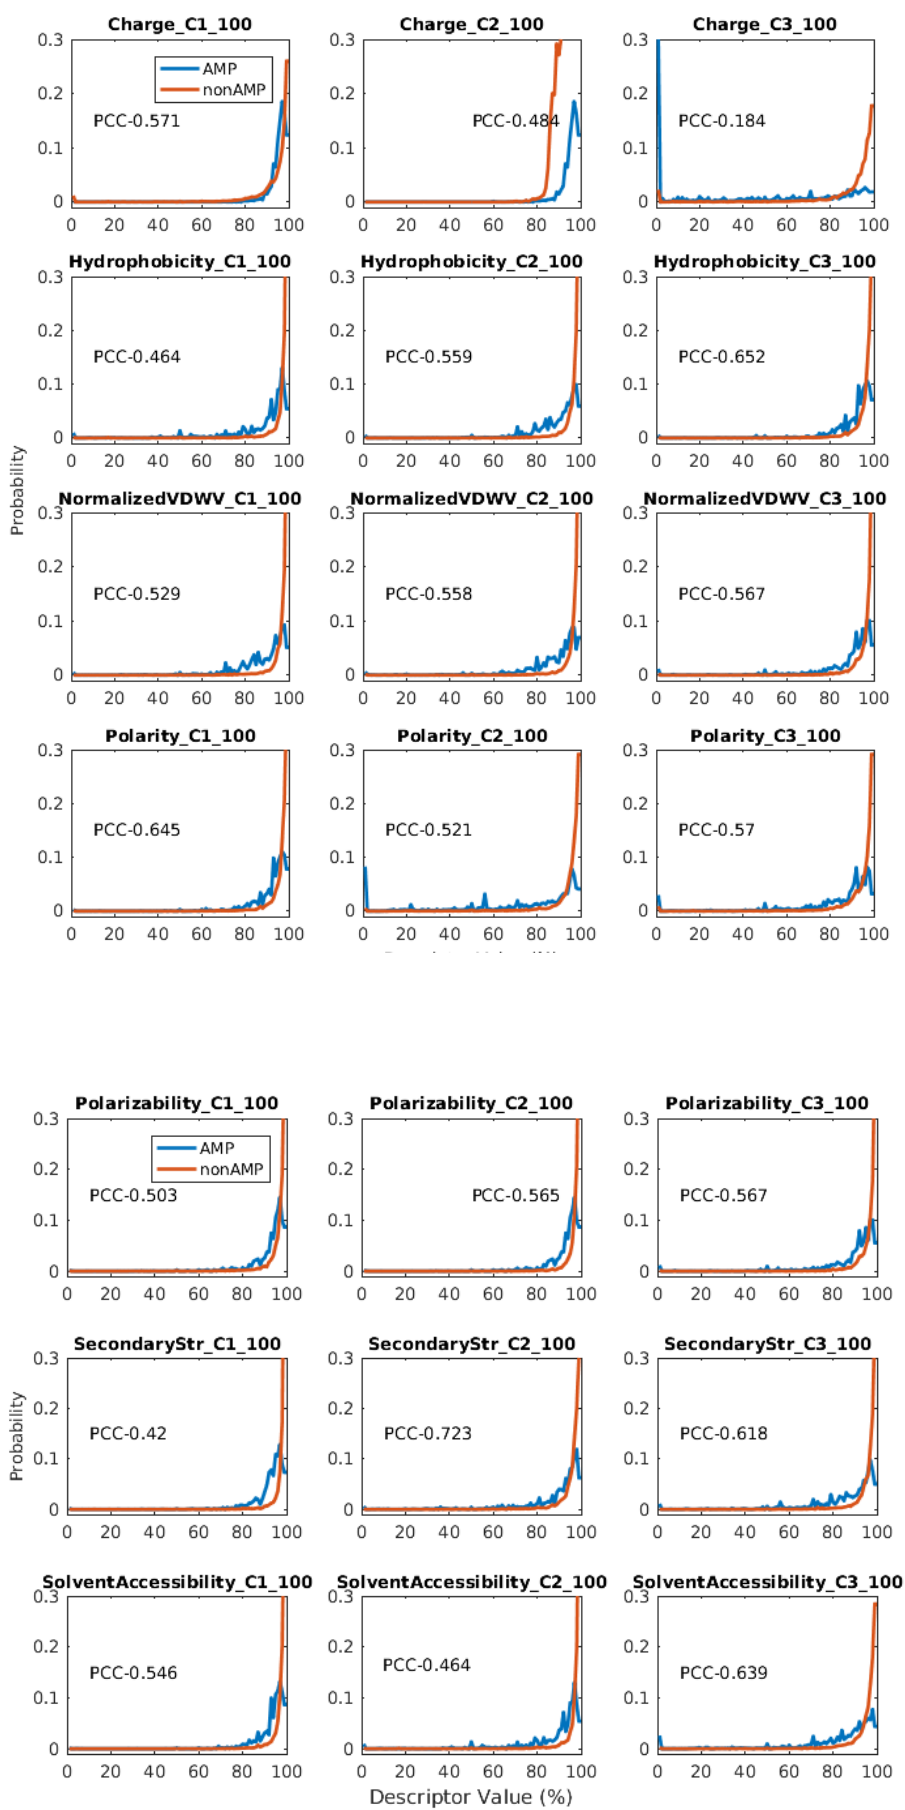

**Supplementary Figure S2.** Comparison of the average descriptor value of “first residue” and “100% residues” computed from the AMP sequences of three datasets ( $M^{\text{model\_train}}$ ,  $C^{\text{test}}$  and  $C^{\text{train}}$ ). Standard deviations are shown as error bars.

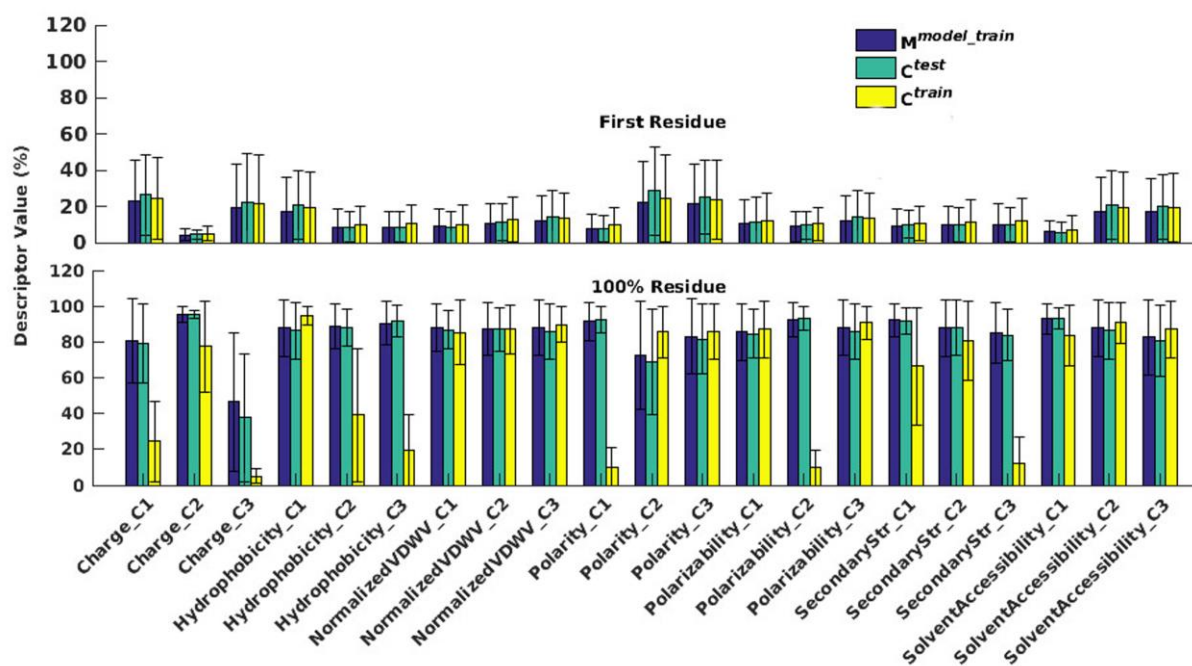

Supplement: 41598_2018_19752_MOESM1_ESM.pdf [file 41598_2018_19752_MOESM1_ESM.pdf]
